# Supplementary material for: Aromatic Selenocyanates as a New Class of Non-Mutagenic Antimicrobial Selenium Compounds with Pronounced Activity against Multidrug Resistant ESKAPE Bacteria
Source: Preprints.org preprint supplement (doi:10.20944/preprints201802.0142.v1), 2018-02-22
Supplement: Supplementary file 1 [file supplementary]

1 **Aromatic selenocyanates as a new class of non-mutagenic antimicrobial selenium compounds with**  
2 **pronounced activity against multidrug resistant ESKAPE bacteria**

3  
4 Muhammad Jawad Nasim <sup>1</sup>, Karolina Witek <sup>2,3</sup>, Annamária Kincses <sup>4</sup>, Muhammad Sarfraz <sup>1</sup>, Ewa Żesławska <sup>5</sup>,  
5 Małgorzata Anna Marć <sup>2</sup>, Márió Gajdács <sup>4</sup>, Gabriella Spengler <sup>4</sup>, Wojciech Nitek <sup>6</sup>, Gniewomir Latacz <sup>2</sup>, Elżbieta  
6 Karczewska <sup>3</sup>, Katarzyna Kieć-Kononowicz <sup>2</sup>, Claus Jacob <sup>1,\*</sup>, Jadwiga Handzlik <sup>2,\*</sup>

7  
8 **Supplementary**

9 **1. General procedure for the synthesis of selenocyanates**

10 Selenocyanates were synthesized using the general protocol described by Wheeler and Merriam  
11 with some modifications [1]. According to the procedure, Alkyl halides (10-20mmol) were treated  
12 with KSeCN (12-25 mmols) in the presence of ethanol (10-20 ml). The reaction mixture was refluxed  
13 for 6 hours and the progress of the reaction was monitored periodically by Thin Layer  
14 Chromatography (TLC). After the completion of the reaction, the inorganic salt was separated by  
15 filtration and the filtrate was heated with charcoal. The reaction mixture was filtered hot and the  
16 filtrate was left for cooling. On cooling, the solution yielded crystals which were separated by  
17 filtration. TLC was performed to evaluate the purity of the compound. Once purified, the samples  
18 were analysed using Mass Spectroscopy (MS) and Nuclear Magnetic Resonance (NMR) for structural  
19 confirmations as well as purity. Synthesis and chemical characteristics of compounds **1**, **3-7** and **10-12**  
20 have been described before and our values are in agreement with the reported values [2-4].

21 *1.1. Synthesis of Benzyl selenocyanate (1)*

22 Benzyl bromide (1.71g, 10 mmol), KSeCN (1.73 g, 12 mmol) and ethanol (10 ml) were used. The  
23 compound (**1**) was obtained as light crystals after purification by recrystallization with ethanol. Yield  
24 72.5% (1.43 g, 7.25 mmol). TLC R<sub>f</sub> (DCM, 100%): 0.64, <sup>1</sup>H NMR (DMSO-d<sub>6</sub>, ppm): δ 7.36(m, 3H, 3C-H),  
25 7.35 (m, 2H, 2 C-H), 4.30 (t, J=9.15 Hz, 2H, CH<sub>2</sub>). <sup>13</sup>C NMR (DMSO-d<sub>6</sub>, ppm): δ 138.79, 129.32 (2C),  
26 129.04 (2C), 128.26,105.36(Se-CN), 33.08. LC-MS: purity 100 %, t<sub>R</sub> = 5.52, (ESI) m/z: calculated for  
27 C<sub>8</sub>H<sub>7</sub>NSe [M+H]<sup>+</sup>. 91.05, found: 91.00.

28 *1.2. Synthesis of 3-Methylbenzyl selenocyanate (3)*

29 3-Methylbenzyl chloride (2.81g, 20 mmol), KSeCN (3.6g, 25 mmol) and ethanol (20 ml) were used.  
30 The compound (**3**) was obtained as light crystals after purification by recrystallization with ethanol.  
31 Yield 83.5% (3.51g, 16.7mmol). TLC R<sub>f</sub> (DCM, 100%): 0.65, <sup>1</sup>H NMR (DMSO-d<sub>6</sub>, ppm): δ 7.23(m, 1H,  
32 CH), 7.16 (m, 2H, 2CH), 7.11 (m, 1H, CH), 4.26 (t, J=9.10 Hz, 2H, CH<sub>2</sub>), 3.24 (s, 3H, CH<sub>3</sub>). <sup>13</sup>C NMR  
33 (DMSO-d<sub>6</sub>, ppm): δ 138.60, 138.15,129.82, 128.93 (2C), 126.42, 105.34 (Se-CN), 33.09, 21.42. LC-MS:  
34 purity 98.57 %, t<sub>R</sub> = 6.24, (ESI) m/z: calculated for C<sub>9</sub>H<sub>9</sub>NSe [M+H]<sup>+</sup>: 105.07, found: 105.02.

35 *1.3. Synthesis of 4-trifluoromethylbenzyl selenocyanate (4)*

36 4-Trifluoromethylbenzyl bromide (4.73g, 20 mmol), KSeCN (3.6g, 25 mmol) and ethanol (20 ml)  
37 were used. The compound (**4**) was obtained as light crystals after purification by recrystallization with  
38 ethanol. Yield 81.75% (4.32g, 16.35mmol). TLC R<sub>f</sub> (DCM, 100%): 0.94, <sup>1</sup>H NMR (DMSO-d<sub>6</sub>, ppm): δ  
39 7.64 (d, J=8.21 Hz, 2H, 2 C-H), 7.42(d, J=8.21 Hz, 2H, 2 C-H), 4.02 (t, J=8.21 Hz, 2H, CH<sub>2</sub>). <sup>13</sup>C NMR  
40 (DMSO-d<sub>6</sub>, ppm): δ 144.67, 130.06, 128.07, 127.64, 125.56, 110.00, 30.87. LC-MS: purity 95.66 %, t<sub>R</sub> =  
41 9.82, (ESI) m/z: calculated for C<sub>9</sub>H<sub>6</sub>F<sub>3</sub>NSe [M+H]<sup>+</sup>: 159.04, found: 159.04.

42 *1.4. Synthesis of 4-fluorobenzyl selenocyanate (5)*

43 4-Fluorobenzyl chloride (2.89g, 20 mmol), KSeCN (3.6g, 25 mmol) and ethanol (20 ml) were used.  
44 The compound (**5**) was obtained as light crystals after purification by recrystallization with ethanol.  
45 Yield 83.45% (3.57g, 16.69 mmol). TLC R<sub>f</sub> (PE:EA; 4:1): 0.60, <sup>1</sup>H NMR (DMSO-d<sub>6</sub>, ppm): δ 7.25 (m, 2H,  
46 2 CH), 7.12 (m, 2H, 2 C-H), 3.92 (t, J=7.62 Hz, 2H, CH<sub>2</sub>). <sup>13</sup>C NMR (DMSO-d<sub>6</sub>, ppm): δ 163.30, 160.07,  
47 135.94, 131.29, 115.43, 30.93. LC-MS: purity 96.30 %, t<sub>R</sub> = 9.06, (ESI) m/z: calculated for C<sub>8</sub>H<sub>6</sub>FNSe  
48 [M+H]<sup>+</sup>: 109.05, found: 109.00.

#### 49 1.5. Synthesis of 2-fluorobenzyl selenocyanate (**6**)

50 2-Fluorobenzyl chloride (2.89g, 20 mmol), KSeCN (3.6g, 25 mmol) and ethanol (20 ml) were used.  
51 The compound (**6**) was obtained as light crystals after purification by recrystallization. Yield 75.45%  
52 (3.23g, 15.09mmol). TLC R<sub>f</sub> (DCM, 100%): 0.53, <sup>1</sup>H NMR (DMSO-d<sub>6</sub>, ppm): δ 7.44 (m, 1H, 1 CH), 7.36  
53 (m, 1H, 1 CH), 7.21(m, 2H, 2 CH), 4.33 (t, J=9.14 Hz, 2H, CH<sub>2</sub>). <sup>13</sup>C NMR (DMSO-d<sub>6</sub>, ppm): δ 161.13,  
54 159.16, 131.56, 130.16, 124.51, 115.59, 104.39 (Se-CN), 25.37. LC-MS: purity 96.30 %, t<sub>R</sub> = 9.06, (ESI) m/z:  
55 calculated for C<sub>8</sub>H<sub>6</sub>FNSe [M+H]<sup>+</sup>: 109.05, found: 109.00.

#### 56 1.6. Synthesis of 4-chlorobenzyl selenocyanate (**7**)

57 4-Chlorobenzyl bromide (2.67g, 16.6 mmol), KSeCN (2.8 g, 19.4 mmol) and ethanol (20 ml) were  
58 used. The compound (**7**) was obtained as light crystals after purification by recrystallization with  
59 ethanol. Yield 85.24% (3.26 g, 14.15 mmol). TLC R<sub>f</sub> (DCM, 100%): 0.75, <sup>1</sup>H NMR (DMSO-d<sub>6</sub>, ppm): δ  
60 7.34 (d, J=8.79 Hz, 2H, 2 CH), 7.25 (d, J=8.21 Hz, 2H, 2 CH), 3.93 (t def., 2H, CH<sub>2</sub>). <sup>13</sup>C NMR (DMSO-d<sub>6</sub>,  
61 ppm): δ 138.78, 131.96, 131.15, 128.72, 30.87. LC-MS: purity 99.35 %, t<sub>R</sub> = 9.99, (ESI) m/z: calculated for  
62 C<sub>8</sub>H<sub>6</sub>ClNSe [M+H]<sup>+</sup>: 125.02, found: 125.02.

#### 63 1.7. Synthesis of 4-bromobenzyl selenocyanate (**10**)

64 4-Bromobenzyl bromide (5g, 20 mmol), KSeCN (3.6g, 25 mmol) and ethanol (20 ml) were used.  
65 The compound (**10**) was obtained as light crystals after purification by recrystallization with ethanol.  
66 Yield 62.15% (3.42g, 12.43mmol). TLC R<sub>f</sub> (DCM, 100%): 0.86, <sup>1</sup>H NMR (DMSO-d<sub>6</sub>, ppm): δ 7.47 (d,  
67 J=8.21 Hz, 2H, CH), 7.18 (d, J=8.21 Hz, 2H, CH), 3.91 (t, J=7.62 Hz, 2H, CH<sub>2</sub>). <sup>13</sup>C NMR (DMSO-d<sub>6</sub>,  
68 ppm): δ 139.18, 131.65, 120.46, 30.93. LC-MS: purity 100 %, t<sub>R</sub> = 10.23, (ESI) m/z: calculated for  
69 C<sub>8</sub>H<sub>6</sub>BrNSe [M+H]<sup>+</sup>: 168.97, found: 168.94.

#### 70 1.8. Synthesis of 4-nitrobenzyl selenocyanate (**11**)

71 4-Nitrobenzyl chloride (3.43g, 20 mmol), KSeCN (3.6g, 25 mmol) and ethanol (20 ml) were used.  
72 The compound (**11**) was obtained as light crystals after purification by recrystallization with ethanol.  
73 Yield 72% (3.47g, 14.4mmol). TLC R<sub>f</sub> (DCM, 100%): 0.50, <sup>1</sup>H NMR (DMSO-d<sub>6</sub>, ppm): δ 8.21 (m, 2H,  
74 CH), 7.63 (m, 2H, CH), 4.39 (t def, 2H, CH<sub>2</sub>). <sup>13</sup>C NMR (DMSO-d<sub>6</sub>, ppm): δ 146.97, 130.57, 124.26,  
75 105.25, 31.61. LC-MS: purity 97.77%, t<sub>R</sub> = 5.30, (ESI) m/z: calculated for C<sub>8</sub>H<sub>6</sub>N<sub>3</sub>O<sub>2</sub>Se[M+H]<sup>+</sup>: 136.04,  
76 found: 135.98.

#### 77 1.9. Synthesis of 2-(selenocyanatomethyl) naphthalene (**12**)

78 2-Chloromethyl naphthalene (2.51g, 14.2 mmol), KSeCN (2.6g, 18 mmol) and ethanol (14 ml)  
79 were used. The compound (**12**) was obtained as light crystals after purification by recrystallization with  
80 ethanol. The compound was obtained in 81.27 % yield (2.85g, 11.54mmol). TLC R<sub>f</sub> (DCM, 100%): 0.77,  
81 <sup>1</sup>H NMR (DMSO-d<sub>6</sub>, ppm): δ 7.92 (m, 4H, CH), 7.53 (m, 3H, CH), 4.49 (t, J=9.14 Hz, 2H, CH<sub>2</sub>). <sup>13</sup>C NMR  
82 (DMSO-d<sub>6</sub>, ppm): δ 135.76, 132.65, 132.36, 128.40, 127.76, 127.60, 127.38, 126.89, 126.49, 126.33, 104.94  
83 (SeCN), 33.12. LC-MS: purity 97.56%, t<sub>R</sub> = 6.73, (ESI) m/z: calculated for C<sub>12</sub>H<sub>9</sub>NSe [M+H]<sup>+</sup>: 141.07,  
84 found: 141.03.

## 85 References

- 86 [1] Wheeler, H.L.; Merriam, H.F. On the action of alkylthiocyanates and alkyl isothiocyanates with thiol acids. *J.*  
87 *Am. Chem. Soc.* **1901**, *23*, 283-299.
- 88 [2] Plano, D.; Baquedano, Y.; Moreno-Mateos, D.; Font, M.; Jimenez-Ruiz, A.; Palop, J.A.; Sanmartin, C.  
89 Selenocyanates and diselenides: a new class of potent antileishmanial agents. *Eur. J. Med. Chem.* **2011**, *46*, 3315-  
90 3323.
- 91 [3] Suzuki, H.; Usuki, M.; Hanafusa, T. A photochemical route to some substituted benzyl isoselenocyanates.  
92 *Synthesis* **1979**, *1979*, 705-707.
- 93 [4] Jacob, L.A.; Matos, B.; Mostafa, C.; Rodriguez, J.; Tillotson, J.K. A facile synthesis of substituted benzyl  
94 selenocyanates *Molecules* **2004**, *9*, 622-626.

95 Spectral data for new compounds

96 <sup>1</sup>H NMRs of Novel Compounds

97 Compound 2

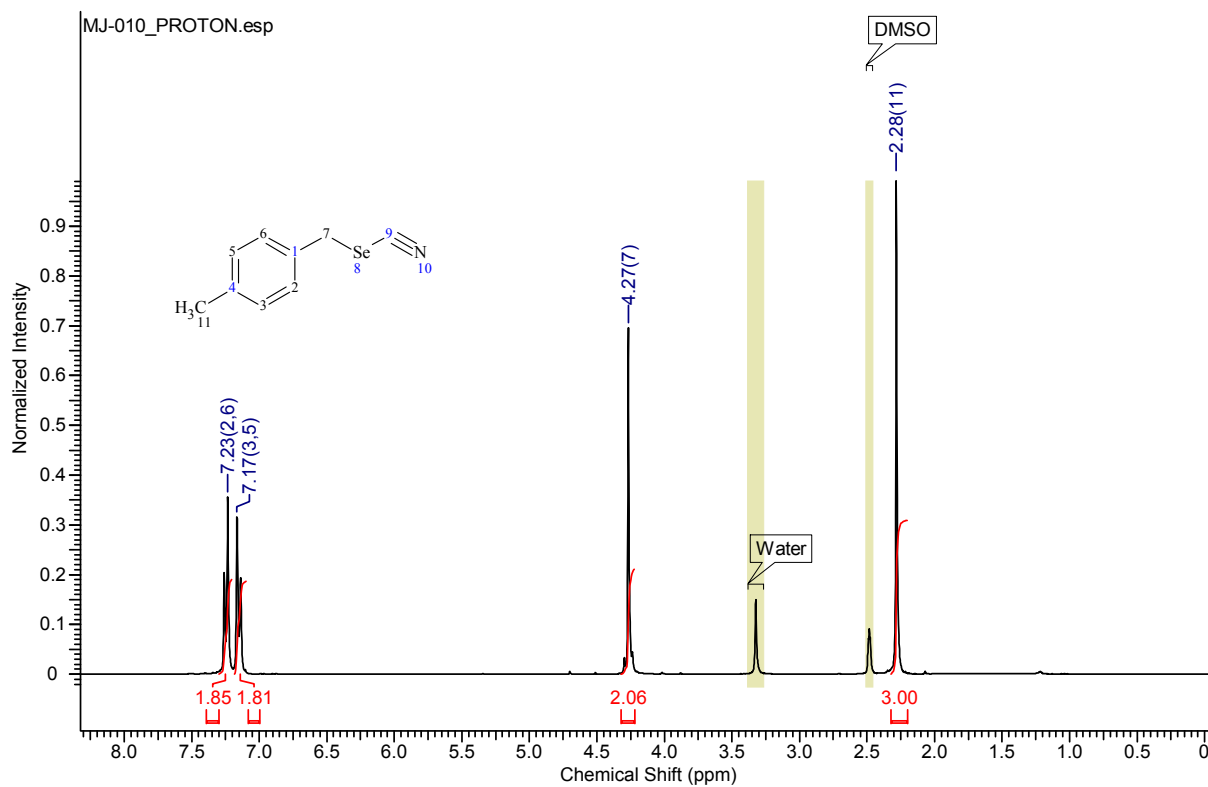

98

99 Compound 8

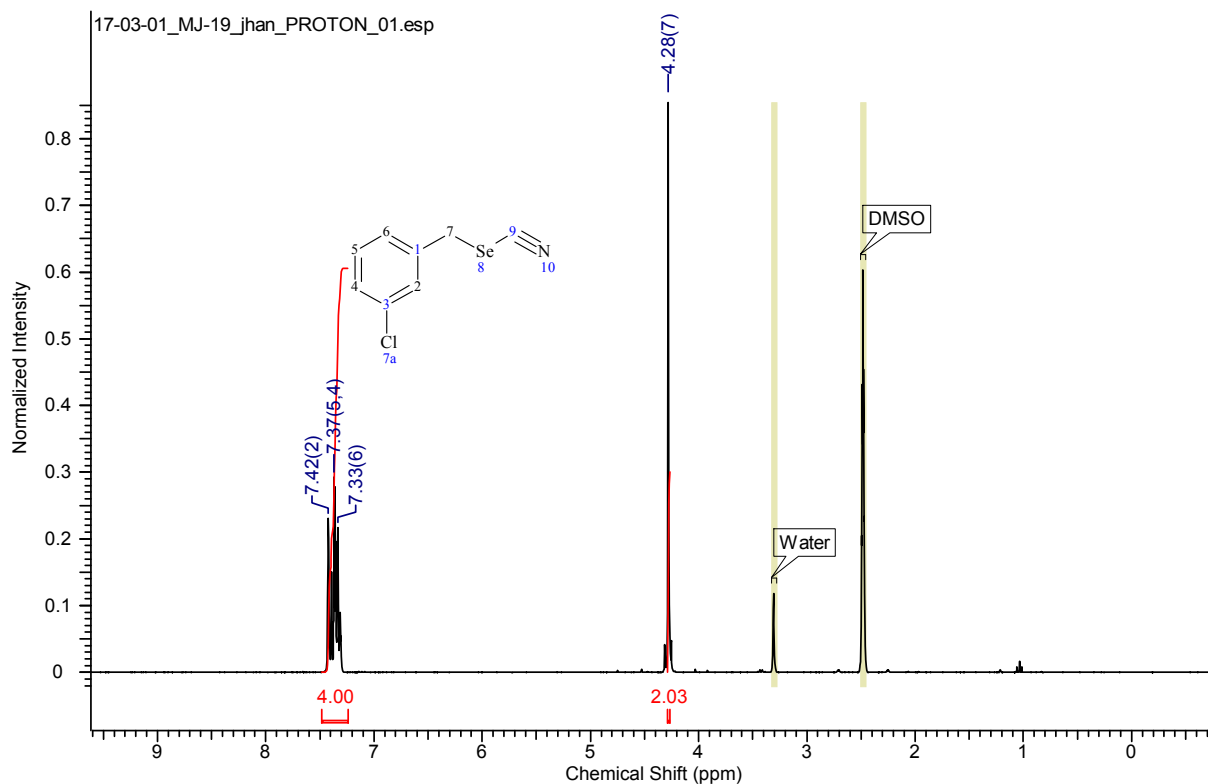

100

101 **Compound 9**

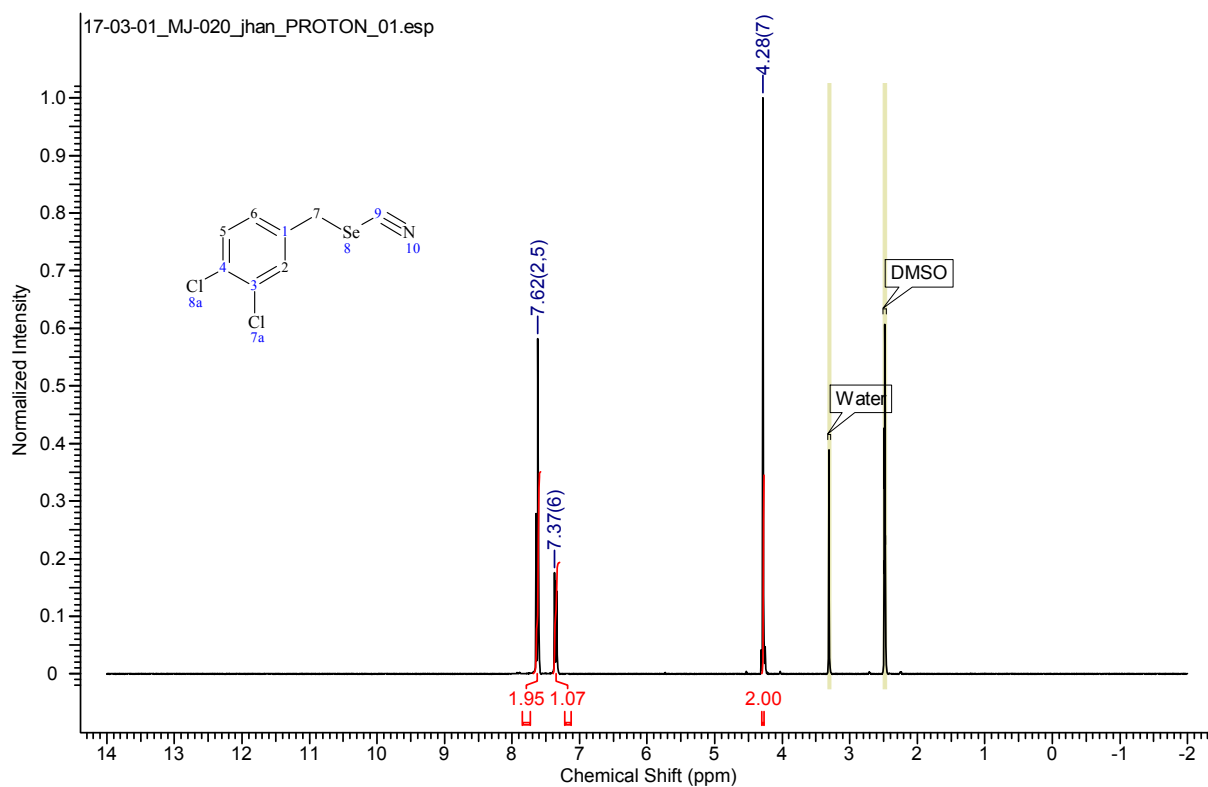

102

103 **Compound 13**

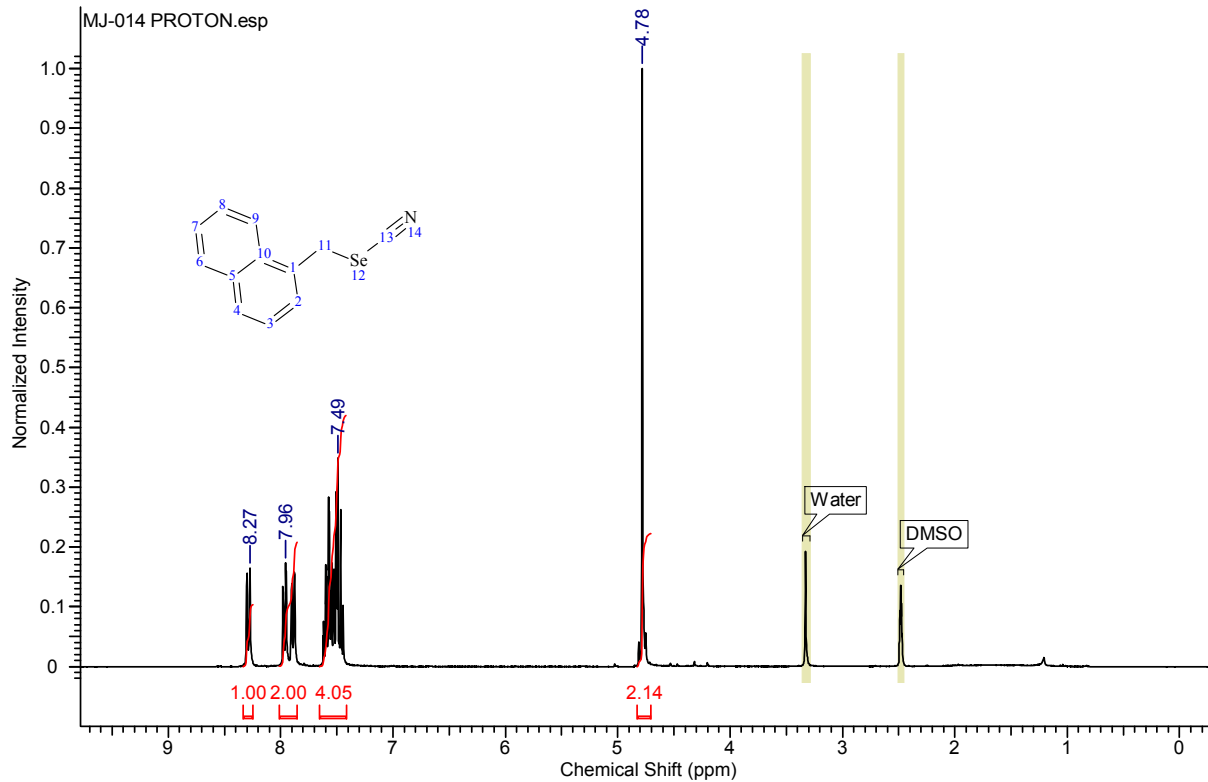

104

105 **13 C NMRs of selected compounds**

106 **Compound 2**

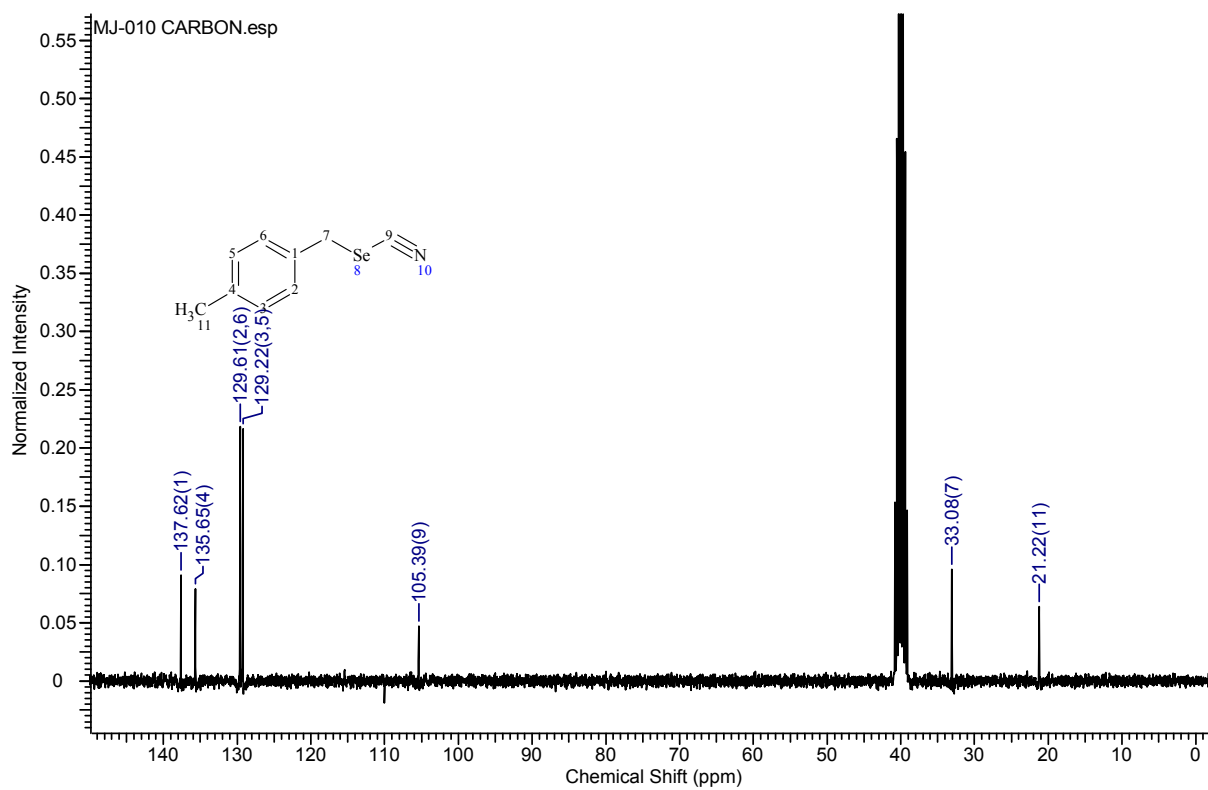

107

108 **Compound 8**

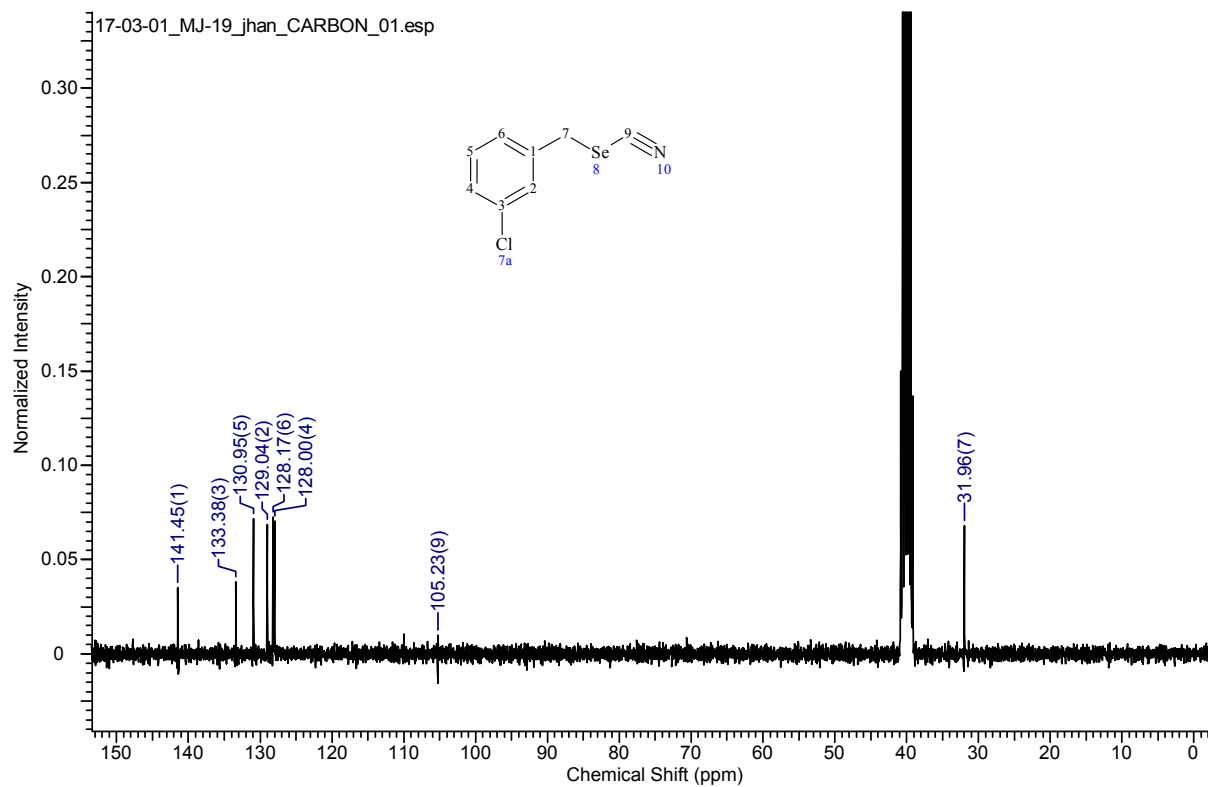

109

110 **Compound 9**

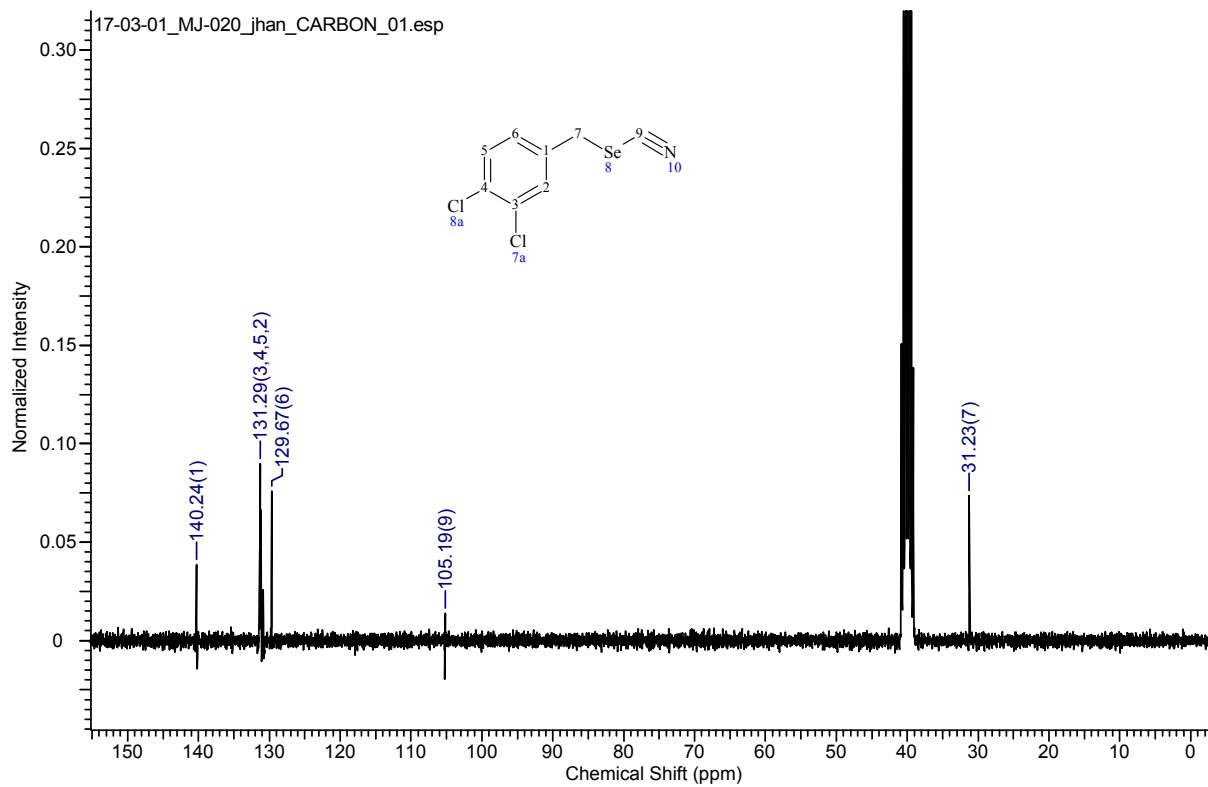

111

112 **Compound 13**

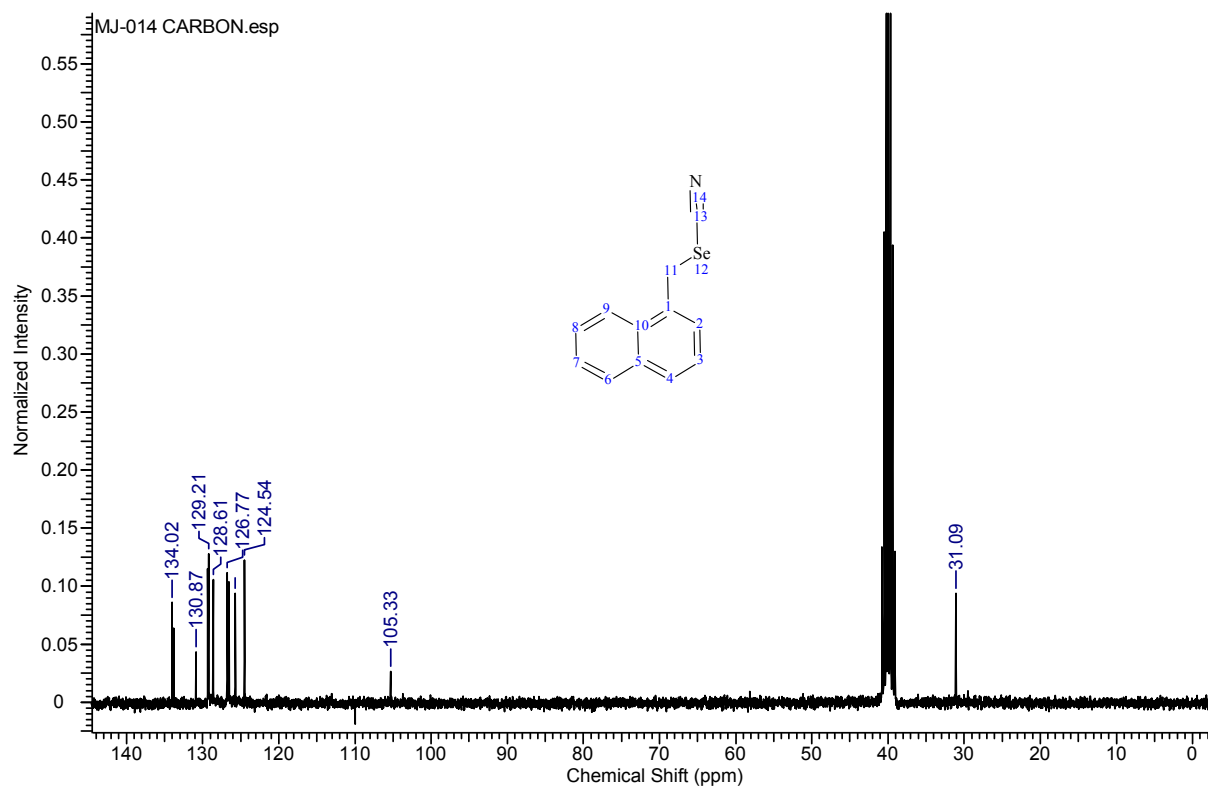

113
